# Supplementary material for: Application of Peak Glucose Range and Diabetes Status in Mortality Risk Stratification in Critically Ill Patients with Sepsis
Source: MDPI journal article supplement (doi:10.3390/diagnostics11101798), 2021-09-29
Supplement: s1 [file s1]

## **Supplementary Material**

### **Evaluation of Peak Glucose Range on Day1 for Predicting Mortality of septic patients in Intensive Care Units**

Kai-Yin Hung, Yi-Hsuan Tsai, Chiung-Yu Lin, Ya-Chun Chang, Yi-Hsi Wang, Meng-Chih Lin ,Wen-Feng Fang

## **Supplementary Materials and Methods**

### **Plasma and purified blood mononuclear cell (PBMC) preparation**

Whole blood (20 mL) was collected from the patients in a heparin tube (BD, Franklin Lakes, NJ, USA). The day of ICU admission was defined as day 1. Using a Ficoll-Paque (Amersham Biosciences, Uppsala, Sweden), whole blood was centrifuged at  $400\ g \times 30\ min$  to separate the plasma and PBMCs. All PBMC samples were treated immediately, and the plasma samples were stored at  $-80^{\circ}\text{C}$  until use. Fresh PBMCs were separated into two aliquots for monocyte human leukocyte antigen-D-related (HLA-DR) expression measurement.

### **Monocyte HLA-DR expression measurement by flow cytometry**

HLA-DR-related monocyte expression was measured by flow cytometry (Cytomics FC500; Beckman Coulter, Inc., Fullerton, CA, USA). Staining and cell acquisition for flow cytometry were performed within 1 h of blood collection. The monoclonal antibodies used were: CD14-PerCP/Cy5.5 (clone: HCD14; Biolegend, San Diego, CA, USA) and HLA-DR-FITC (clone: L243; Biolegend) per 100  $\mu\text{L}$  of PBMCs. The negative controls were mouse monoclonal antibodies IgG1, PerCP/Cy5.5 (clone: MOPC-21), IgG2a, FITC (clone: MOPC-173), and IgG2a, PE (clone: MOPC-173), all of which were isotype-matched, as recommended by the manufacturer. Monocytes were characterised based on the basis of their CD14 expression. At least 30,000 PBMCs were analysed for each sample. The results are expressed as percentages of HLA-DR-positive monocytes per total monocyte population.

## **Supplemental material for Tables 1**

Pairwise comparison:

Significant difference between groups (1=P1 group, 2=P2 group, 3=P3)

7-day mortality: 2 vs. 3

90-day mortality: 2 vs. 3, 1 vs. 3

Age: 1 vs. 3

Body mass index (BMI): 1 vs. 3, 2 vs. 3

Sex: 3 vs. 1, 3 vs. 2

Acute Physiology and Chronic Health Evaluation II (APACHE II): 1 vs. 3, 2 vs. 3

Charlson comorbidity index: nil

Hypertension: 1 vs. 3

Diabetes mellitus: 1 vs. 2, 1 vs. 3, 2 vs. 3

Glycated haemoglobin (HbA1c): 1 vs. 2, 1 vs. 3, 2 vs. 3

Glucose in the emergency room (ER): 1 vs. 2, 1 vs. 3, 2 vs. 3

**Table S1** Baseline characteristics and outcomes of septic patients in the validation cohort

| by DM status or peak glucose level<br>on day 1                        | DM<br>(n=199)   | Non-DM<br>(n=293) | P <sup>†</sup> | P1 group<br>(n=153) | P2 group<br>(n=149) | P3 group<br>(n=137) | P*    |
|-----------------------------------------------------------------------|-----------------|-------------------|----------------|---------------------|---------------------|---------------------|-------|
| <b>Demographic characteristics, median (25th and 75th percentile)</b> |                 |                   |                |                     |                     |                     |       |
| Age (years)                                                           | 70(62.5,79.5)   | 68(57.5,80.3)     | 0.104          | 68(58,79)           | 68(61,80)           | 75(64,82)           | 0.037 |
| BMI, kg/m <sup>2</sup>                                                | 23.8(20.8,28.2) | 22.2(19.5,26.0)   | 0.001          | 22.8(19.6,26.6)     | 23.1(20.1,26.3)     | 23.7(20.1,27.6)     | 0.267 |
| Sex (male), n (%)                                                     | 114 (57.3)      | 185 (63.1)        | 0.192          | 102(38.8)           | 89(33.8)            | 72(27.4)            | 0.050 |
| APACHE II                                                             | 23(19,28)       | 21(17,27)         | 0.001          | 21(17,26.5)         | 22(17,27)           | 23.5(19,28)         | 0.028 |
| Charlson comorbidity index                                            | 5(4,7)          | 4(2,6)            | <0.001         | 4(2,7)              | 5(3,7)              | 6(4,7)              | 0.005 |
| <b>Comorbidities, n (%)</b>                                           |                 |                   |                |                     |                     |                     |       |
| Coronary artery disease                                               | 38 (19.1)       | 25 (8.5)          | 0.001          | 16(27.1)            | 23(39.0)            | 20(33.9)            | 0.399 |
| History of stroke                                                     | 28 (14.1)       | 24 (8.2)          | 0.037          | 16(37.2)            | 9(20.9)             | 18(41.9)            | 0.124 |
| Hypertension                                                          | 144 (72.4)      | 125 (42.7)        | <0.001         | 76(31.0)            | 78(31.8)            | 91(37.1)            | 0.009 |
| COPD                                                                  | 32 (16.1)       | 44 (15.0)         | 0.749          | 23(34.8)            | 22(33.3)            | 21(31.8)            | 0.991 |
| Cancer                                                                | 42 (21.1)       | 99 (33.8)         | 0.002          | 51(40.2)            | 41(32.3)            | 35(27.6)            | 0.310 |
| CKD                                                                   | 86 (43.4)       | 55(18.8)          | <0.001         | 38(27.9)            | 47(34.6)            | 51(37.5)            | 0.073 |
| Liver cirrhosis                                                       | 11 (5.5)        | 28 (9.6)          | 0.105          | 11(29.7)            | 10(27.0)            | 16(43.2)            | 0.254 |
| <b>Site of suspected infection, n (%)</b>                             |                 |                   |                |                     |                     |                     |       |
| Lung                                                                  | 153 (76.9)      | 230 (78.5)        | 0.672          | 121(35.4)           | 111(32.5)           | 110(32.2)           | 0.454 |
| UTI                                                                   | 131 (65.8)      | 200 (68.3)        | 0.573          | 102(34.9)           | 95(32.5)            | 95(32.5)            | 0.607 |
| Bacteremia                                                            | 56 (28.1)       | 90 (30.7)         | 0.539          | 54(40.9)            | 42(31.8)            | 36(27.3)            | 0.205 |

|                         |           |            |       |          |          |          |       |
|-------------------------|-----------|------------|-------|----------|----------|----------|-------|
| Others                  | 17 (8.5)  | 21 (7.2)   | 0.575 | 14(38.9) | 11(30.6) | 11(30.6) | 0.852 |
| <b>Mortality, n (%)</b> |           |            |       |          |          |          |       |
| 7-day mortality         | 9 (4.5)   | 16 (5.5)   | 0.642 | 8(33.3)  | 7(29.2)  | 9(37.5)  | 0.776 |
| 28-day mortality        | 41 (20.6) | 60 (20.5)  | 0.973 | 33(35.9) | 24(26.1) | 35(38)   | 0.143 |
| 90-day mortality        | 74 (37.2) | 100 (34.1) | 0.486 | 50(31.4) | 48(30.2) | 61(38.4) | 0.051 |

<sup>†</sup> Comparison analyses between two groups by Mann–Whitney U tests or chi-square tests for categorical variables

P\*: Comparison analyses among three groups using one-way analysis of variance (ANOVA), with Kruskal–Wallis test as a non-parametric alternative to ANOVA for non-normally distributed continuous variables or chi-square tests for categorical variables

Abbreviations: COPD, chronic obstructive pulmonary disease; CKD, chronic kidney disease; UTI, urinary tract infection; HLA-DR, human leukocyte antigen-D-related

**Table S2.** Mortality comparisons between DM and non-DM groups by Cox proportional-hazards regression in the validation cohort

|                                                         |                                        |                | <b>Model 1</b>                            |                | <b>Model 2</b>                            |                |
|---------------------------------------------------------|----------------------------------------|----------------|-------------------------------------------|----------------|-------------------------------------------|----------------|
| <b>DM compared to non-DM<br/>(non -DM as reference)</b> | <b>Crude Hazard Ratio<br/>(95% CI)</b> | <b>p value</b> | <b>Adjusted Hazard Ratio<br/>(95% CI)</b> | <b>p value</b> | <b>Adjusted Hazard Ratio<br/>(95% CI)</b> | <b>p value</b> |
| <b>Cox proportional-hazards regression analysis</b>     |                                        |                |                                           |                |                                           |                |
| 7-day mortality                                         | 1.224(0.541-2.770)                     | 0.627          | 1.624(0.665-3.970)                        | 0.287          | 1.087(0.397-2.975)                        | 0.871          |
| 28-day mortality                                        | 0.981(0.659-1.459)                     | 0.924          | 1.248(0.823-1.892)                        | 0.297          | 0.889(0.557-1.418)                        | 0.622          |
| 90-day mortality                                        | 0.908(0.672-1.226)                     | 0.529          | 1.220(0.890-1.672)                        | 0.216          | 0.822(0.575-1.176)                        | 0.284          |

Model 1: Adjusted for age, sex, BMI, APACHE II, Charlson comorbidity index

Model 2: Adjusted for age, sex, BMI, APACHE II, Charlson comorbidity index, coronary artery disease, history of stroke, hypertension, COPD, cancer, CKD, liver cirrhosis

**Table S3.** Cox proportional-hazards regression analysis for 90-day mortality (Crude HR) in the construction cohort

| variable                                                          | Crude Hazard Ratio (95% CI) | p value |
|-------------------------------------------------------------------|-----------------------------|---------|
| Peak glucose on day 1                                             | 1.001 (1.000-1.002)         | 0.032   |
| DM status (with compared to without)                              | 0.775 (0.621-0.969)         | 0.025   |
| 3-group tool (P2 compared to P3)<br>(peak glucose level on day 1) | 0.680 (0.522-0.884)         | 0.004   |
| Age                                                               | 0.998 (0.991-1.005)         | 0.581   |
| Gender (male)                                                     | 1.150 (0.924-1.432)         | 0.212   |
| BMI                                                               | 0.993 (0.971-1.014)         | 0.500   |
| APACHE II                                                         | 1.026 (1.013-1.039)         | <0.001  |
| Charlson comorbidity index                                        | 1.176 (1.119-1.236)         | <0.001  |
| Day 1 SIRS                                                        | 1.156 (1.041-1.283)         | 0.006   |
| Day 1 qSOFA                                                       | 1.275 (1.094-1.485)         | 0.002   |
| Day 1 SOFA                                                        | 1.105 (1.075-1.137)         | <0.001  |
| Day 3 SIRS                                                        | 1.317 (1.183-1.466)         | <0.001  |
| Day 3 qSOFA                                                       | 1.568 (1.305-1.884)         | <0.001  |
| Day 3 SOFA                                                        | 1.169 (1.132-1.206)         | <0.001  |
| Day 1 HLA-DR expression%                                          | 0.983 (0.969-0.997)         | 0.015   |
| Day 3 HLA-DR expression %                                         | 0.979 (0.963-0.995)         | 0.010   |
| Coronary artery disease                                           | 0.854 (0.664-1.097)         | 0.216   |
| History of stroke                                                 | 0.822 (0.621-1.089)         | 0.172   |

|                 |                     |        |
|-----------------|---------------------|--------|
| Hypertension    | 0.853 (0.689-1.056) | 0.144  |
| COPD            | 0.969 (0.720-1.306) | 0.838  |
| Cancer          | 2.105 (1.682-2.635) | <0.001 |
| CKD             | 1.090 (0.834-1.424) | 0.530  |
| Liver cirrhosis | 1.824 (1.325-2.513) | <0.001 |



**Table S4.** Cox proportional-hazards regression analysis for 90-day mortality (Crude HR) in the validation cohort

| variable                                                          | Crude Hazard Ratio (95% CI) | p value |
|-------------------------------------------------------------------|-----------------------------|---------|
| Peak glucose on day 1                                             | 1.002 (1.000-1.003)         | 0.015   |
| DM status (with compared to without)                              | 0.908(0.672-1.226)          | 0.529   |
| 3-group tool (P2 compared to P3)<br>(peak glucose level on day 1) | 0.648(0.444-0.947)          | 0.025   |
| Age                                                               | 1.002(0.992-1.012)          | 0.731   |
| Gender (male)                                                     | 0.971(0.715-1.320)          | 0.853   |
| BMI                                                               | 0.999(0.992-1.005)          | 0.633   |
| APACHE II                                                         | 1.067(1.047-1.088)          | <0.001  |
| Charlson comorbidity index                                        | 1.141(1.084-1.201)          | <0.001  |
| Day 1 SIRS                                                        | 1.494(1.280-1.744)          | <0.001  |
| Day 1 qSOFA                                                       | 1.587(1.300-1.938)          | <0.001  |
| Day 1 SOFA                                                        | 1.133(1.094-1.174)          | <0.001  |
| Day 3 SIRS                                                        | 1.611(1.394-1.862)          | <0.001  |
| Day 3 qSOFA                                                       | 1.868(1.514-2.304)          | <0.001  |
| Day 3 SOFA                                                        | 1.169(1.128-1.210)          | <0.001  |
| Coronary artery disease                                           | 1.125(0.706-1.792)          | 0.621   |
| History of stroke                                                 | 0.807(0.482-1.350)          | 0.414   |
| Hypertension                                                      | 0.850(0.631-1.144)          | 0.284   |
| COPD                                                              | 0.889(0.582-1.358)          | 0.587   |

|                 |                    |        |
|-----------------|--------------------|--------|
| Cancer          | 2.598(1.927-3.503) | <0.001 |
| CKD             | 0.992(0.714-1.378) | 0.961  |
| Liver cirrhosis | 2.334(1.505-3.621) | <0.001 |

**Table S5.** Cox proportional-hazards regression analysis for 90-day mortality (Adjusted HR) in the validation cohort

|                                                                   | <b>Model 1</b>                            |                | <b>Model 2</b>                            |                |
|-------------------------------------------------------------------|-------------------------------------------|----------------|-------------------------------------------|----------------|
| <b>variable</b>                                                   | <b>Adjusted Hazard Ratio<br/>(95% CI)</b> | <b>p value</b> | <b>Adjusted Hazard Ratio<br/>(95% CI)</b> | <b>p value</b> |
| <b>Total</b>                                                      |                                           |                |                                           |                |
| Peak glucose on day 1                                             | 1.001(0.999-1.003)                        | 0.202          | 1.002(1.000-1.004)                        | 0.026          |
| DM status (with compared to without)                              | 0.820(0.598-1.123)                        | 0.216          | 1.216(0.851-1.738)                        | 0.284          |
| 3-group tool (P2 compared to P3)<br>(peak glucose level on day 1) | 0.758(0.514-1.117)                        | 0.161          | 0.649(0.429-0.981)                        | 0.040          |
|                                                                   |                                           |                |                                           |                |
| <b>With DM</b>                                                    |                                           |                |                                           |                |
| Peak glucose on day 1                                             | 1.003(1.001-1.005)                        | 0.005          | 1.003(1.001-1.005)                        | 0.005          |
| 3-group tool (P2 compared to P3)<br>(peak glucose level on day 1) | 0.562(0.325-0.972)                        | 0.039          | 0.511(0.291-0.896)                        | 0.019          |
|                                                                   |                                           |                |                                           |                |
| <b>Without DM</b>                                                 |                                           |                |                                           |                |
| Peak glucose on day 1                                             | 0.999(0.996-1.003)                        | 0.681          | 0.998(0.995-1.002)                        | 0.347          |
| 3-group tool (P2 compared to P3)<br>(peak glucose level on day 1) | 1.004(0.553-1.972)                        | 0.894          | 1.552(0.723-3.330)                        | 0.259          |

Model 1: Adjusted for age, sex, BMI, APACHE II, Charlson comorbidity index

Model 2: Adjusted for age, sex, BMI, APACHE II, Charlson comorbidity index, coronary artery disease, history of stroke, hypertension, COPD, cancer, CKD, liver cirrhosis

**Table S6.** Serial clinical sepsis scores and immune status of septic patients (median [IQR]) in the construction cohort

|                                    | DM          | Non-DM      | p <sup>†</sup> | P1 group  | P2 group    | P3 group    | p*    |
|------------------------------------|-------------|-------------|----------------|-----------|-------------|-------------|-------|
| <b>Day 1</b>                       |             |             |                |           |             |             |       |
|                                    | (n=386)     | (n=336)     |                | (n=213)   | (n=274)     | (n=235)     |       |
| SIRS                               | 2 (1)       | 2 (1)       | 0.590          | 2 (1)     | 2 (1)       | 3 (1)       | 0.019 |
| qSOFA                              | 2 (1)       | 2 (1)       | 0.014          | 2 (1)     | 2 (1)       | 2 (1)       | 0.426 |
| SOFA                               | 9 (5)       | 9 (6)       | 0.396          | 9 (5)     | 8 (5)       | 10 (6)      | 0.008 |
| SOFA sub-scores                    |             |             |                |           |             |             |       |
| Respiratory score                  | 3 (1)       | 2 (2)       | 0.933          | 2 (2)     | 2 (2)       | 3 (1)       | 0.067 |
| CV score                           | 0 (3)       | 0 (4)       | 0.253          | 1 (4)     | 0 (1)       | 0 (4)       | 0.006 |
| CNS score                          | 3 (2)       | 3 (2)       | 0.009          | 3 (2)     | 3 (2)       | 3 (2)       | 0.005 |
| Renal score                        | 1 (3)       | 1 (2)       | 0.001          | 1 (2)     | 1 (2)       | 2 (3)       | 0.084 |
| Coagulation score                  | 0 (2)       | 0 (2)       | 0.258          | 0 (2)     | 0 (1.5)     | 0 (2)       | 0.938 |
| Hepatic score                      | 0 (0)       | 0 (1)       | 0.059          | 0 (1)     | 0 (0)       | 0 (1)       | 0.313 |
| HLA-DR expression (%) <sup>#</sup> | 92.4 (21.1) | 91.9 (19.8) | 0.699          | 90.4 (24) | 96.6 (13.7) | 88.8 (21.7) | 0.013 |
| <b>Day 3</b>                       |             |             |                |           |             |             |       |
|                                    | (n=368)     | (n=306)     |                | (n=196)   | (n=262)     | (n=216)     |       |
| SIRS                               | 2 (2)       | 2 (2)       | 0.825          | 2 (2)     | 2 (2)       | 2 (2)       | 0.710 |
| qSOFA                              | 1 (1)       | 1 (1)       | 0.143          | 1 (1)     | 1 (1)       | 1 (1)       | 0.774 |
| SOFA                               | 7 (5)       | 7 (5)       | 0.785          | 8 (5)     | 7 (5)       | 7 (5)       | 0.330 |
| SOFA sub-scores                    |             |             |                |           |             |             |       |
| Respiratory score                  | 2 (1)       | 2 (2)       | 0.090          | 2 (2)     | 2 (2)       | 2 (1)       | 0.109 |

|                       |             |             |       |             |            |             |       |
|-----------------------|-------------|-------------|-------|-------------|------------|-------------|-------|
| CV score              | 0 (1)       | 0 (1)       | 0.159 | 0 (1)       | 0 (1)      | 0 (1)       | 0.359 |
| CNS score             | 3 (1)       | 3 (1)       | 0.233 | 3 (1)       | 3 (1)      | 3 (2)       | 0.013 |
| Renal score           | 1 (3)       | 0 (2)       | 0.004 | 1 (2)       | 1 (3)      | 1 (3)       | 0.110 |
| Coagulation score     | 1 (2)       | 1 (2)       | 0.382 | 1 (2)       | 0 (2)      | 1 (2)       | 0.275 |
| Hepatic score         | 0 (1)       | 0 (1)       | 0.043 | 0 (1)       | 0 (1)      | 0 (1)       | 0.719 |
| HLA-DR expression (%) | 93.3 (14.3) | 94.9 (14.0) | 0.242 | 92.9 (13.6) | 97.6 (9.1) | 91.1 (16.7) | 0.001 |

Expressed as median (interquartile range)

# Patients with HLA-DR data on day 1: DM=89, non-DM =60, P1=38, P2=52, P3=59

## Patients with HLA-DR data on day 3: DM=82, Non-DM=53, P1=37, P2=48, P3=50

<sup>†</sup> Comparison analyses between two groups by Mann–Whitney U tests or chi-square tests for categorical variables

P\*: Comparison analyses among three groups using one-way analysis of variance (ANOVA), with Kruskal–Wallis as a non-parametric alternative to ANOVA for non-normally distributed continuous variables or chi-square tests for categorical variables

Abbreviations: HLA-DR, human leukocyte antigen-D-related

**Table S7.** Serial clinical sepsis scores and immune status of septic patients (median [IQR]) in the validation cohort

|                   | DM      | Non-DM  | p <sup>†</sup> | P1 group | P2 group | P3 group | p*     |
|-------------------|---------|---------|----------------|----------|----------|----------|--------|
| <b>Day 1</b>      |         |         |                |          |          |          |        |
|                   | (n=199) | (n=293) |                | (n=153)  | (n=149)  | (n=137)  |        |
| SIRS              | 2(2)    | 2(1)    | 0.190          | 2(1)     | 2(2)     | 2(2)     | 0.427  |
| qSOFA             | 1(1)    | 1(1)    | 0.117          | 1(1)     | 1(1)     | 1.5(1)   | 0.915  |
| SOFA              | 10(6)   | 9(7)    | 0.861          | 8(6)     | 9(6)     | 10.5(7)  | 0.226  |
|                   |         |         |                |          |          |          |        |
| Respiratory score | 3(3)    | 3(2)    | 0.566          | 2(2)     | 3(2)     | 3(3)     | 0.465  |
| CV score          | 0(0)    | 0(4)    | 0.873          | 0(4)     | 0(0)     | 0(4)     | 0.308  |
| CNS score         | 2(2)    | 2(1)    | 0.010          | 2(1)     | 2(1)     | 3(2)     | 0.509  |
| Renal score       | 2(2)    | 1(2)    | <0.001         | 1(2)     | 1(3)     | 2(3)     | <0.001 |
| Coagulation score | 0(2)    | 0(1)    | 0.631          | 0(2)     | 0(1)     | 0(2)     | 0.245  |
| Hepatic score     | 0.5(2)  | 0(2)    | 0.712          | 0(1)     | 0(2)     | 1(2)     | 0.366  |
| <b>Day 3</b>      |         |         |                |          |          |          |        |
|                   | (n=199) | (n=293) |                | (n=153)  | (n=149)  | (n=137)  |        |
| SIRS              | 2(2)    | 2(1)    | 0.228          | 1.5(1)   | 2(2)     | 2(2)     | 0.141  |
| qSOFA             | 1(1)    | 1(1)    | 0.832          | 1(1)     | 2(1)     | 1(1)     | 0.910  |
| SOFA              | 7(6)    | 7(5)    | 0.300          | 6(5)     | 7(6)     | 7.5(7)   | 0.510  |
|                   |         |         |                |          |          |          |        |
| Respiratory score | 2(2)    | 2(2)    | 0.199          | 1.5(2)   | 2(1)     | 2(2)     | 0.582  |
| CV score          | 0(0)    | 0(3)    | 0.696          | 0(3)     | 0(0)     | 0(1)     | 0.084  |

|                   |      |      |        |      |      |      |       |
|-------------------|------|------|--------|------|------|------|-------|
| CNS score         | 2(2) | 2(1) | 0.835  | 2(1) | 2(1) | 2(1) | 0.840 |
| Renal score       | 2(3) | 0(2) | <0.001 | 1(2) | 1(3) | 1(2) | 0.312 |
| Coagulation score | 1(2) | 0(2) | 0.024  | 0(2) | 1(2) | 1(2) | 0.137 |
| Hepatic score     | 0(1) | 0(1) | 0.061  | 0(1) | 0(1) | 1(2) | 0.796 |

Expressed as median (interquartile range)

<sup>†</sup> Comparison analyses between two groups by Mann–Whitney U tests or chi-square tests for categorical variables

P\*: Comparison analyses among three groups using one-way analysis of variance (ANOVA), with Kruskal–Wallis as a non-parametric alternative to ANOVA for non-normally distributed continuous variables or chi-square tests for categorical variables

**Table S8.** Baseline characteristics and outcomes of septic patients between cohorts

|                                                                       | Construction cohort<br>(n=722) | Validation cohort<br>(n=492) | P <sup>†</sup> |
|-----------------------------------------------------------------------|--------------------------------|------------------------------|----------------|
| <b>Demographic characteristics, median (25th and 75th percentile)</b> |                                |                              |                |
| Age (years)                                                           | 68 (59.0,79.0)                 | 69.2 (59.5,80.1)             | 0.053          |
| BMI, kg/m <sup>2</sup>                                                | 22.5 (19.4,25.9)               | 23.0 (19.8,26.6)             | 0.068          |
| Sex (male), n (%)                                                     | 431 (59.7)                     | 299 (60.8)                   | 0.707          |
| APACHE II                                                             | 25 (20,31)                     | 22 (17,27)                   | <0.001         |
| Charlson comorbidity index                                            | 2 (1,3)                        | 5 (3,7)                      | <0.001         |
| <b>Comorbidities, n (%)</b>                                           |                                |                              |                |
| Coronary artery disease                                               | 187 (25.9)                     | 63 (12.8)                    | <0.001         |
| History of stroke                                                     | 133 (18.4)                     | 52 (10.6)                    | <0.001         |
| Hypertension                                                          | 409 (56.7)                     | 269 (54.7)                   | 0.480          |
| COPD                                                                  | 101 (14.0)                     | 76 (15.4)                    | 0.480          |
| Cancer                                                                | 166 (23.2)                     | 141 (28.7)                   | 0.033          |
| CKD                                                                   | 229 (31.7)                     | 141 (28.7)                   | 0.265          |
| Liver cirrhosis                                                       | 68 (9.4)                       | 39 (7.9)                     | 0.368          |
| <b>Site of suspected infection, n (%)</b>                             |                                |                              |                |
| Lung                                                                  | 458 (63.4)                     | 383 (77.8)                   | <0.001         |
| UTI                                                                   | 157 (21.7)                     | 331 (67.3)                   | <0.001         |
| Bacteremia                                                            | 57 (7.9)                       | 146 (29.7)                   | <0.001         |



|                         |            |            |        |
|-------------------------|------------|------------|--------|
| Others                  | 146 (20.2) | 38 (7.7)   | <0.001 |
| <b>Mortality, n (%)</b> |            |            |        |
| 7-day mortality         | 98 (13.6)  | 25 (5.1)   | <0.001 |
| 28-day mortality        | 212 (29.4) | 101 (20.5) | 0.001  |
| 90-day mortality        | 311 (43.1) | 174 (35.4) | 0.007  |

**Table S9.** Baseline characteristics and outcomes of septic patients between study and exclusion group in construction cohort

| by DM status or peak glucose level<br>on day 1                        | Study group<br>(n=722) | Exclusion group (n=77) | P <sup>†</sup> |
|-----------------------------------------------------------------------|------------------------|------------------------|----------------|
| <b>Demographic characteristics, median (25th and 75th percentile)</b> |                        |                        |                |
| Age (years)                                                           | 68.0 (59.0-79.0)       | 65.0 (54.0-76.0)       | 0.234          |
| BMI, kg/m <sup>2</sup>                                                | 22.5 (19.4-25.9)       | 21.9 (18.8-24.6)       | 0.054          |
| Sex (male), n (%)                                                     | 431 (58.9)             | 45 (58.4)              | 0.831          |
| APACHE II                                                             | 25.0 (20.0-31.0)       | 20.0 (15.0-25.0)       | <0.001         |
| Charlson comorbidity index                                            | 2.0 (1.0-3.0)          | 2.0 (1.0-6.0)          | 0.356          |
| <b>Comorbidities, n (%)</b>                                           |                        |                        |                |
| Coronary artery disease                                               | 187 (25.9)             | 17 (22.1)              | 0.465          |
| History of stroke                                                     | 133 (18.4)             | 14 (18.2)              | 0.959          |
| Hypertension                                                          | 409 (56.7)             | 35 (45.5)              | 0.058          |
| COPD                                                                  | 101 (14.0)             | 16 (20.8)              | 0.109          |
| Cancer                                                                | 166 (23.2)             | 24 (31.3)              | 0.121          |

|                                                                      |                    |                    |        |
|----------------------------------------------------------------------|--------------------|--------------------|--------|
| CKD                                                                  | 160 (31.6)         | 6 (11.3)           | 0.002  |
| Liver cirrhosis                                                      | 68 (9.4)           | 1 (1.3)            | 0.016  |
| Diabetes mellitus                                                    | 349 (48.3)         | 7 (9.1)            | <0.001 |
| <b>Site of suspected infection, n (%)</b>                            |                    |                    |        |
| Lung                                                                 | 458 (63.1)         | 57 (74.0)          | 0.065  |
| UTI                                                                  | 157 (21.7)         | 12 (15.6)          | 0.208  |
| Bacteremia                                                           | 57 (7.9)           | 4 (5.2)            | 0.396  |
| Others                                                               | 146 (20.2)         | 13 (16.9)          | 0.485  |
| <b>Baseline glucose and HbA1c, median (25th and 75th percentile)</b> |                    |                    |        |
| HbA1c (%)                                                            | 6.7(5.8-8.0)       | 6.0(5.6-6.7)       | 0.017  |
| Glucose (mg/dL)                                                      | 159.0(125.0-243.0) | 143.5(118.8-192.8) | 0.026  |
| <b>Mortality, n (%)</b>                                              |                    |                    |        |
| 7-day mortality                                                      | 98 (13.6)          | 4 (5.2)            | 0.036  |
| 28-day mortality                                                     | 212 (29.4)         | 15 (19.5)          | 0.068  |
| 90-day mortality                                                     | 311 (43.1)         | 28 (36.4)          | 0.257  |

stratified by DM status or peak glucose level on day 1

<sup>†</sup> Comparison analyses between two groups by Mann–Whitney U tests or chi-square tests for categorical variables
